# Supplementary material
Source: publisher figshare collection journal article supplement (https://frontiersin.figshare.com/ndownloader/files/15296939)
Supplement: Supplementary file [file 15296939]

*Supplementary Material*

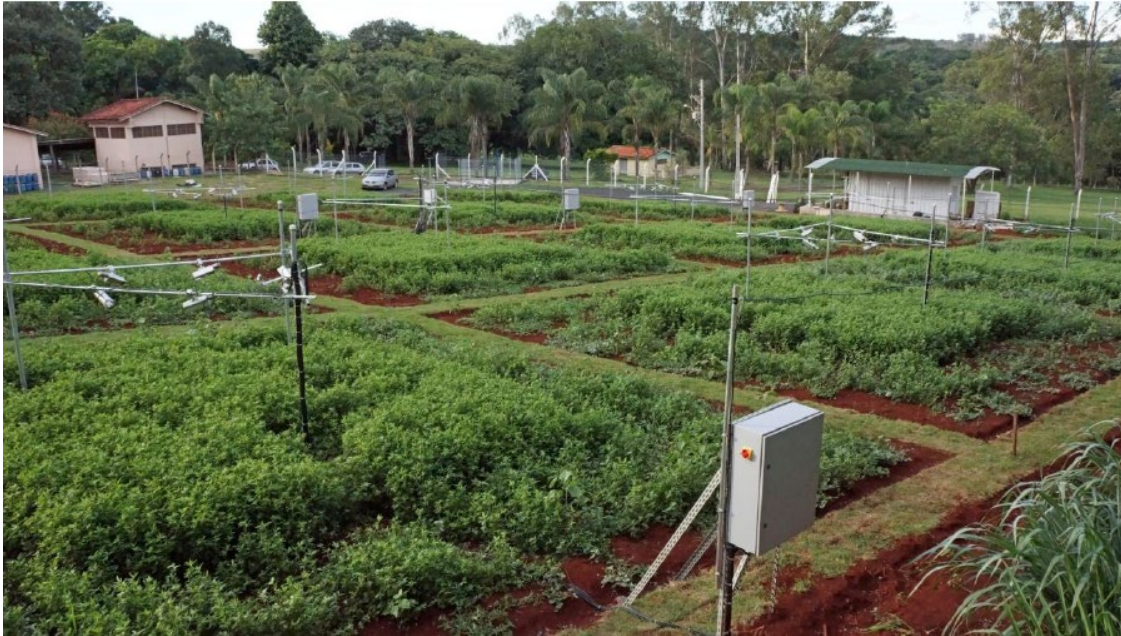

**Supplementary Figure 1.** Trop-T-FACE facility during *S. capitata* establishment.
